# Supplementary material for: Similarity in Recombination Rate Estimates Highly Correlates with Genetic Differentiation in Humans
Source: PubMed Central journal article supplement (PMC3065460; doi:10.1371/journal.pone.0017913), 2011-03-28

# Chromosome 22

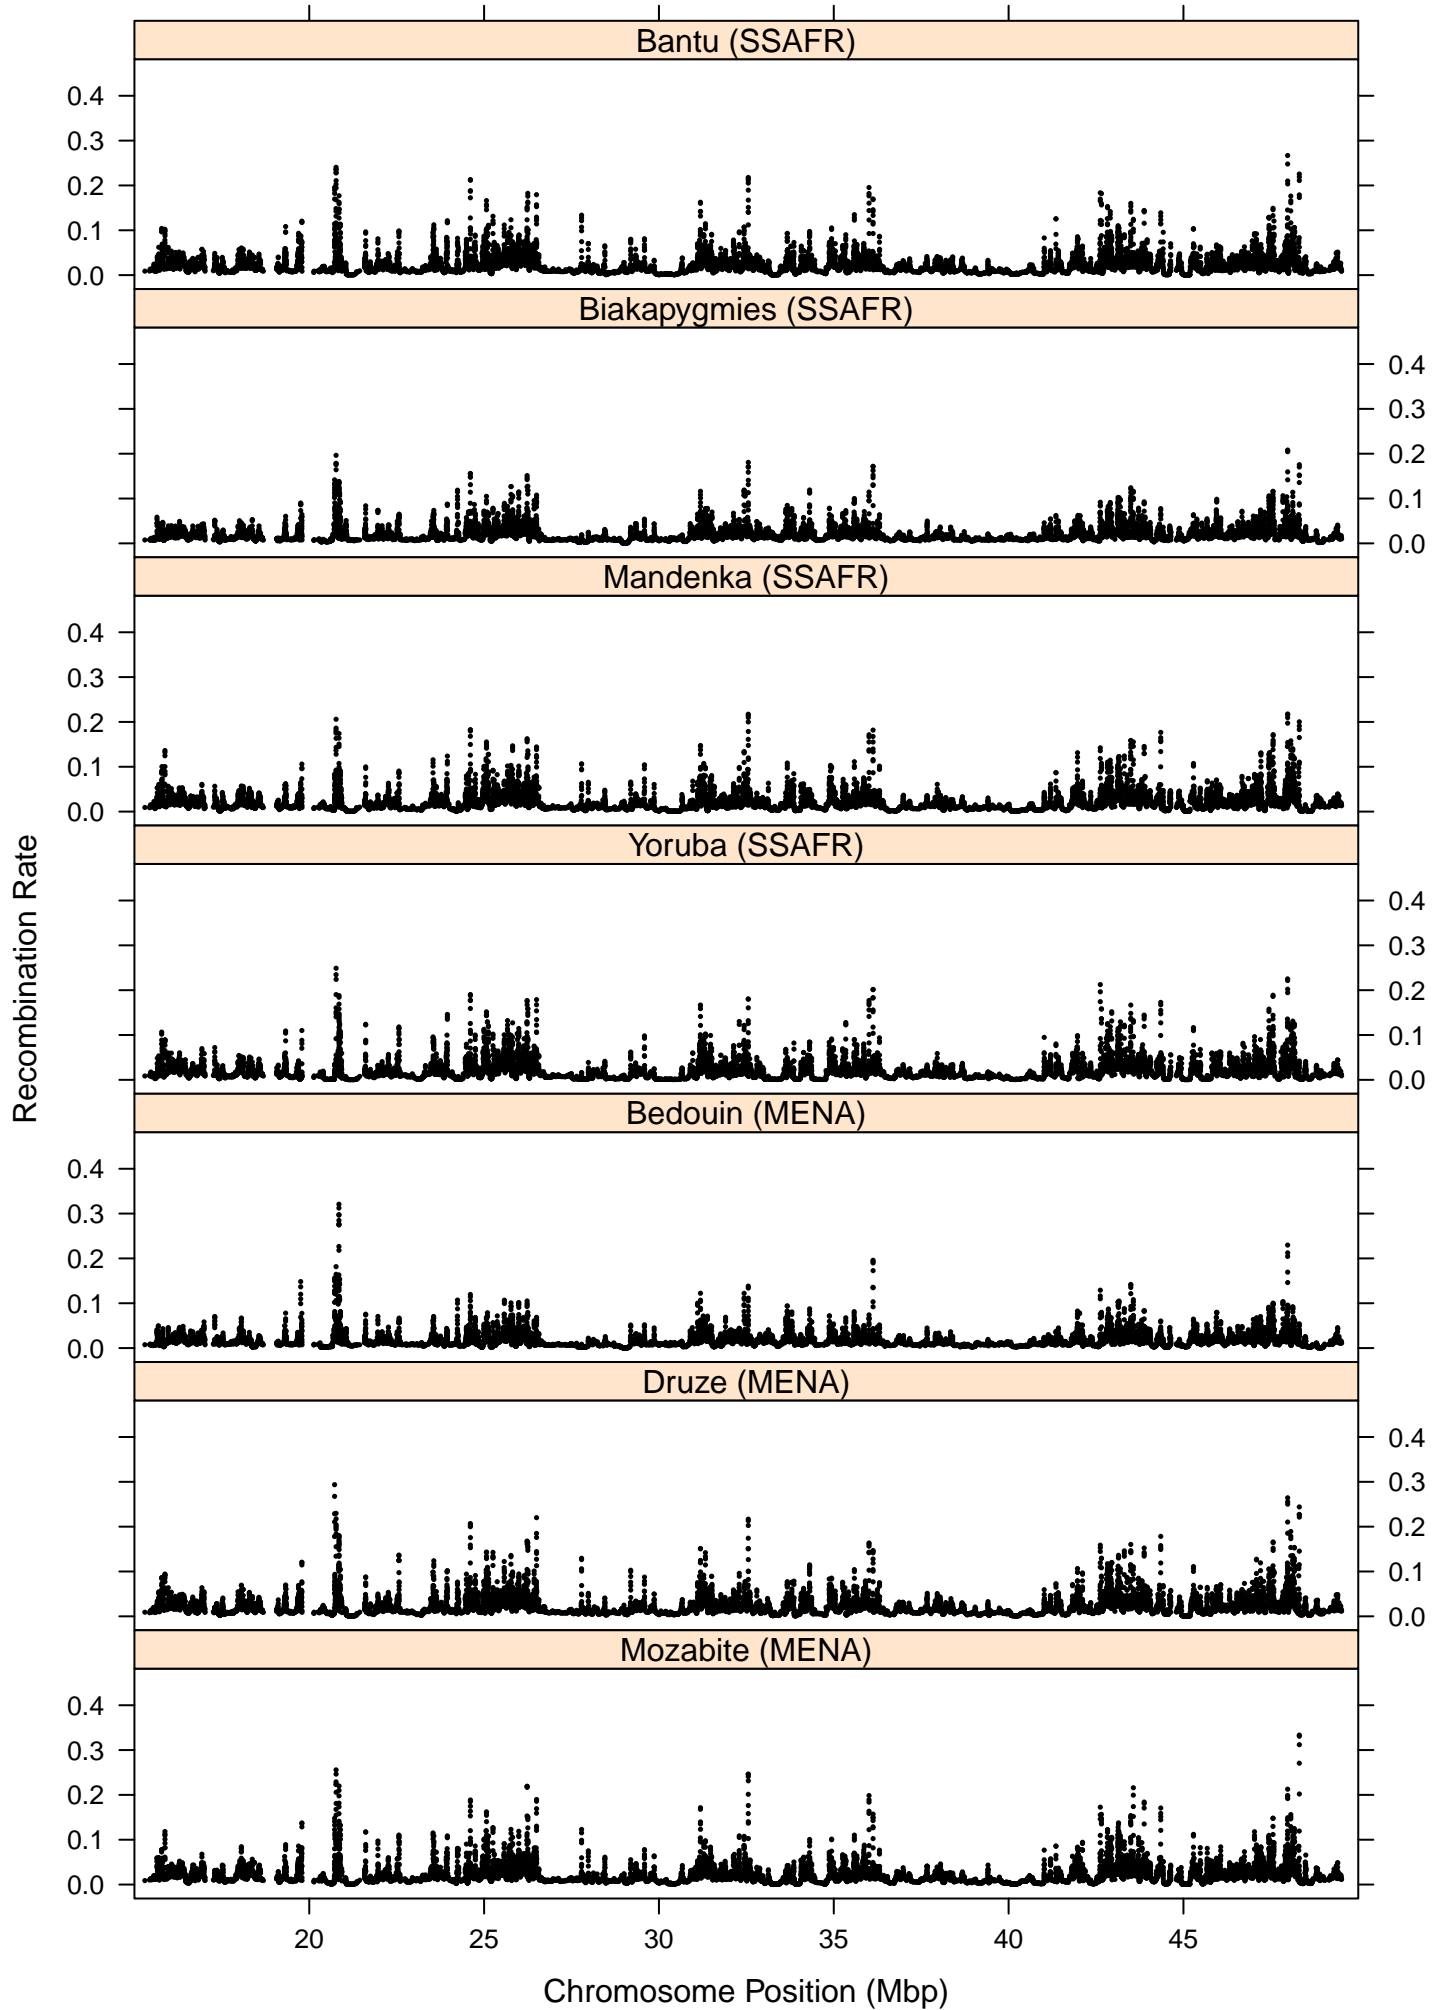

# Chromosome 22

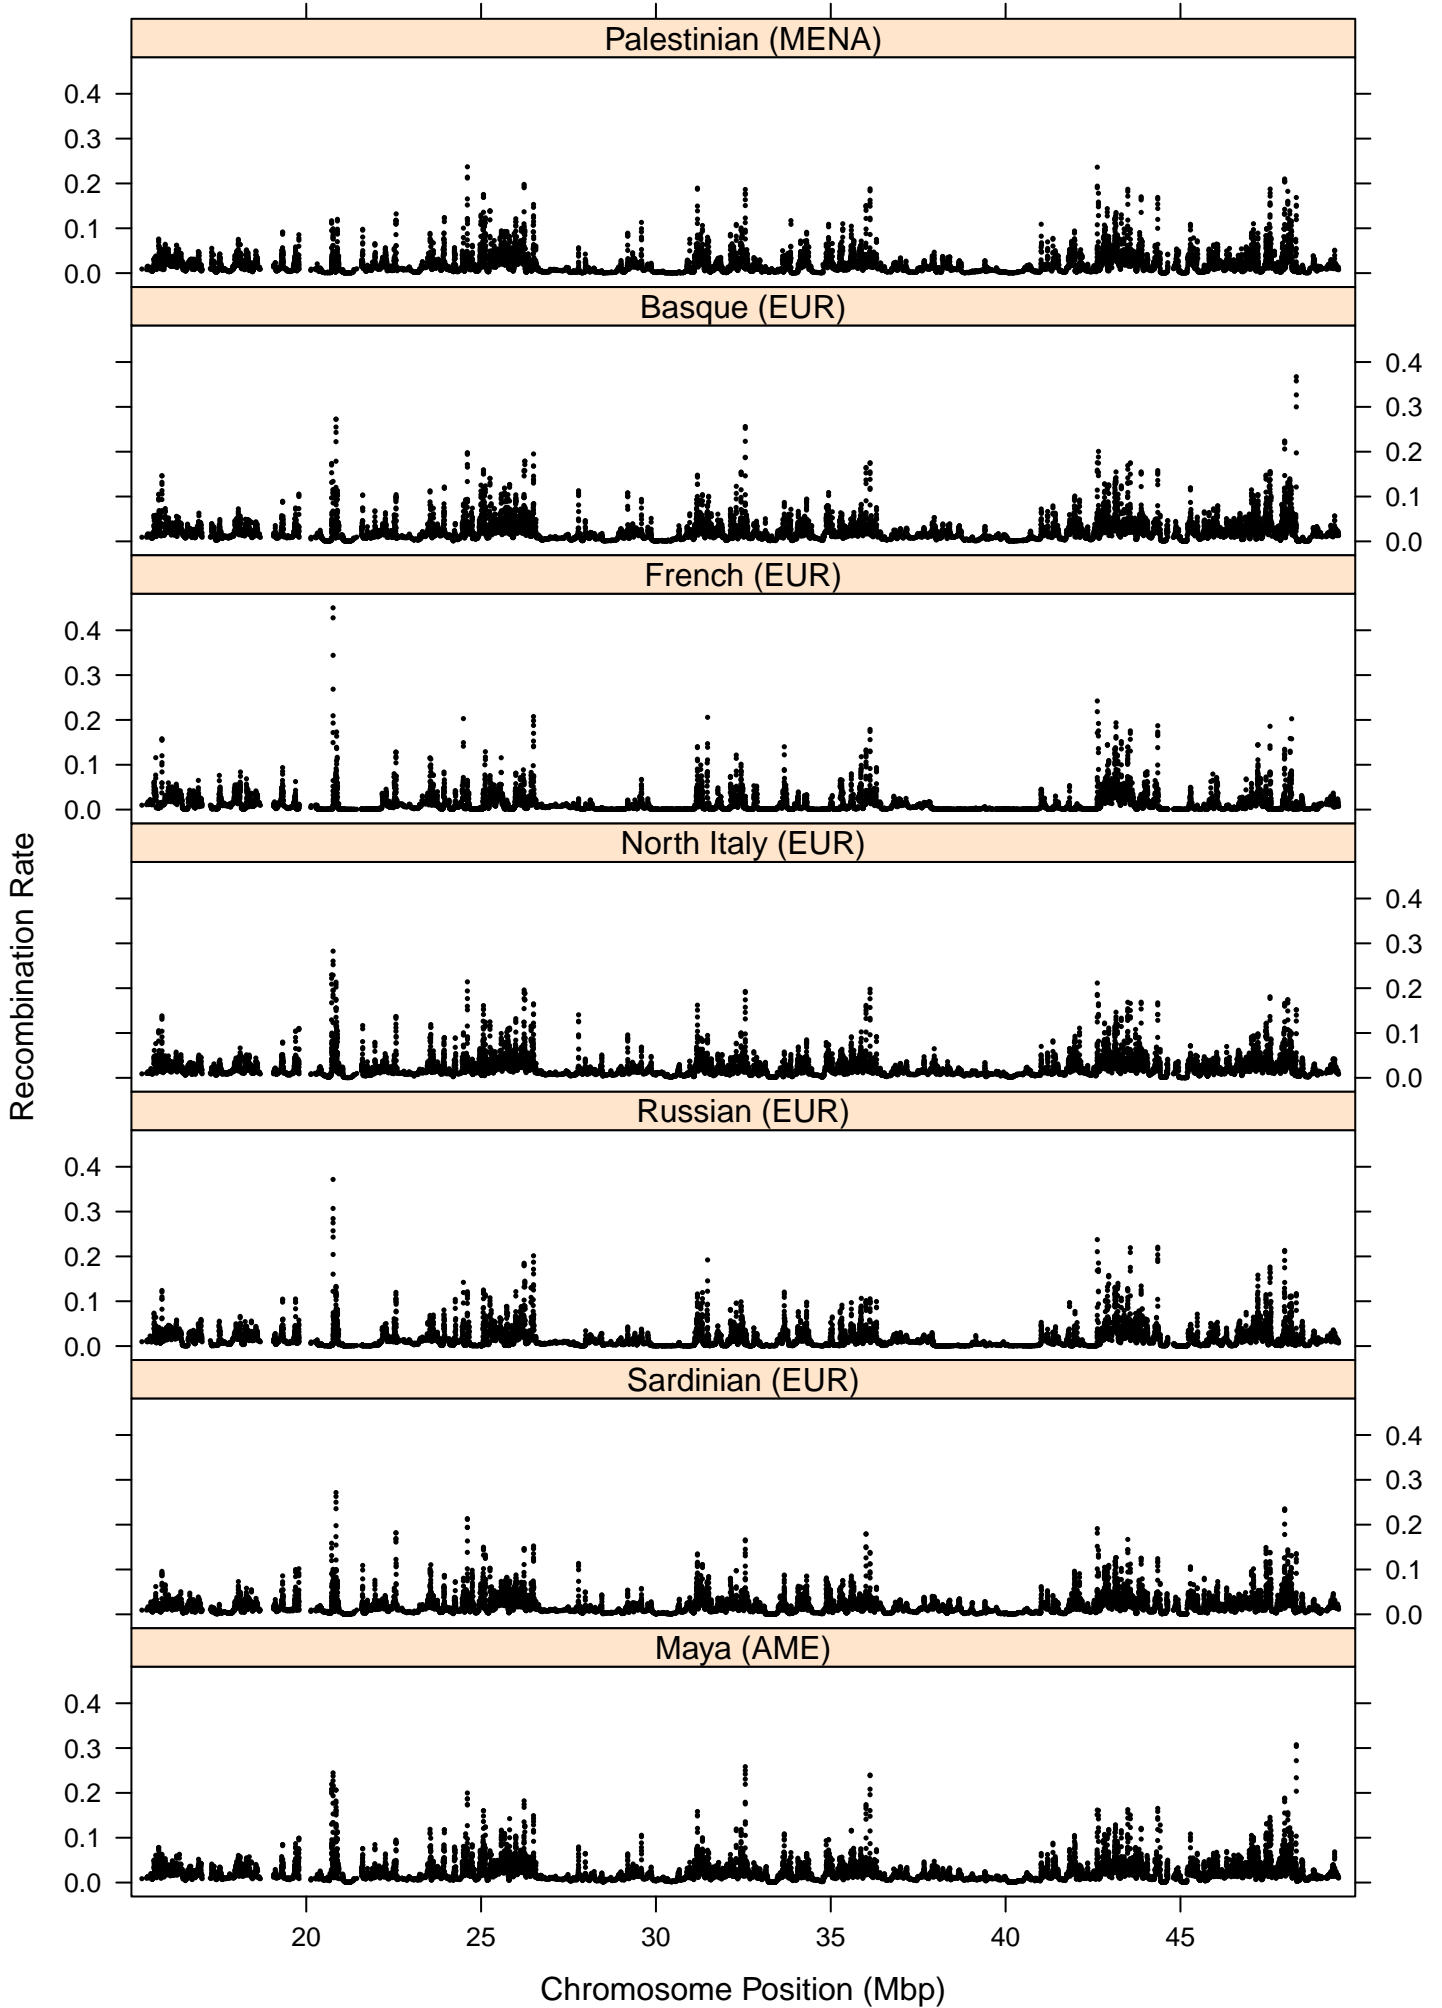

# Chromosome 22

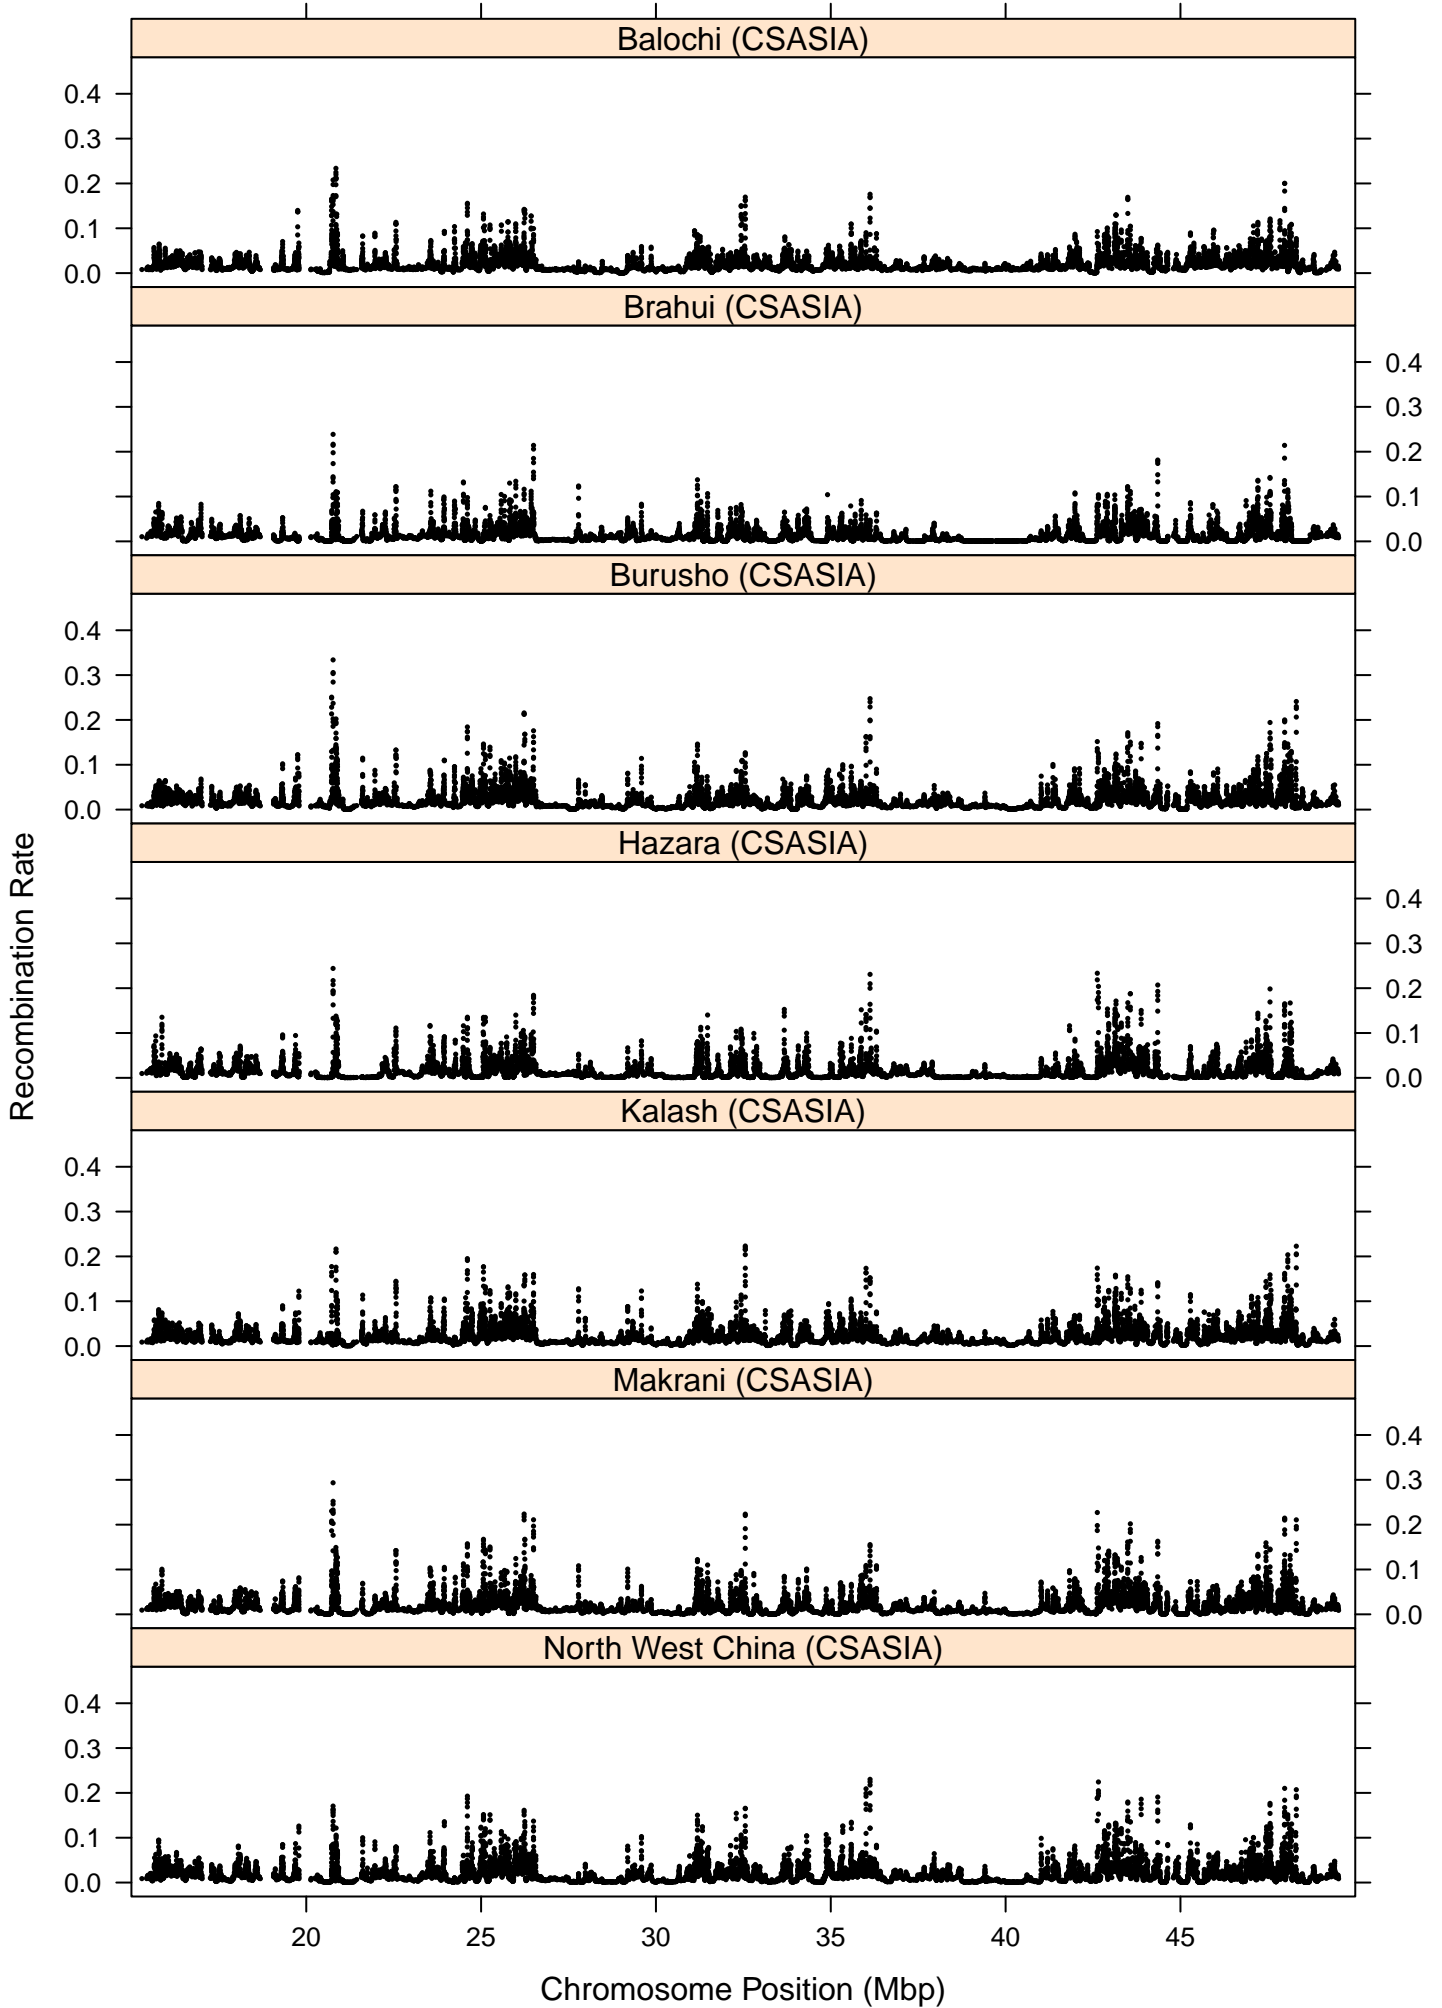

# Chromosome 22

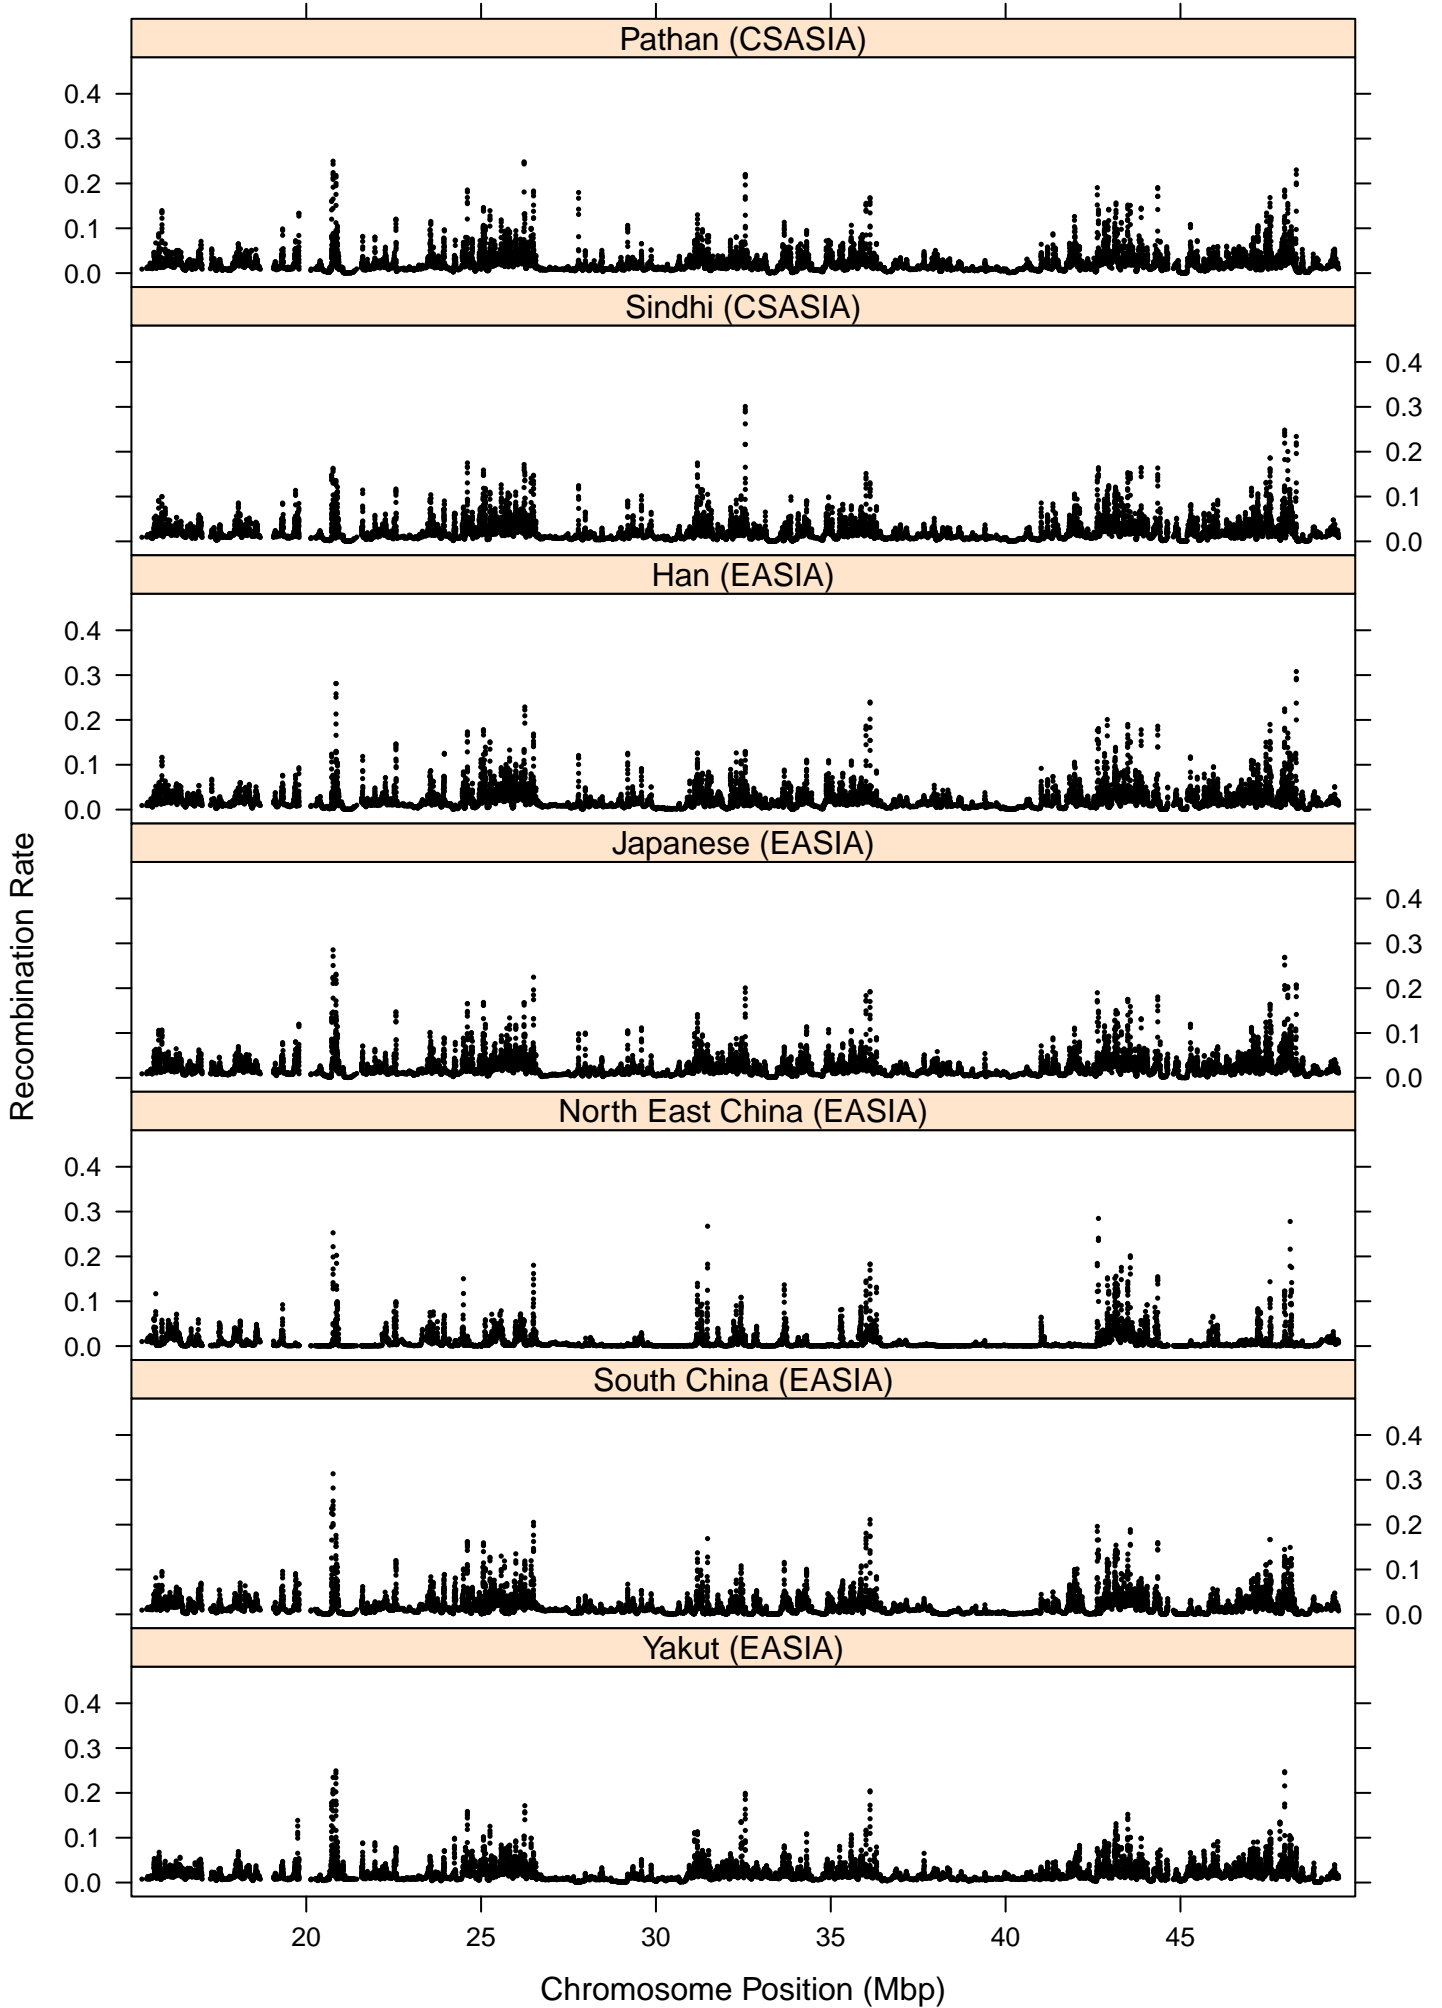

Supplement: pone.0017913.s001.pdf [file pone.0017913.s001.pdf]
